# Supplementary material for: Comprehensive Molecular Analysis of DMD Gene Increases the Diagnostic Value of Dystrophinopathies: A Pilot Study in a Southern Italy Cohort of Patients
Source: MDPI journal article supplement (doi:10.3390/diagnostics11101910), 2021-10-15
Supplement: s1 [file s1]

# Comprehensive Molecular Analysis of *DMD* Gene Increases the Diagnostic Value of Dystrophinopathies: A Pilot Study in a Southern Italy Cohort of Patients

Fatima Domenica Elisa De Palma <sup>1,2,†</sup>, Marcella Nunziato <sup>1,2,†</sup>, Valeria D'Argenio <sup>1,3</sup>, Maria Savarese <sup>1,2</sup>, Gabriella Esposito <sup>1,2,\*</sup> and Francesco Salvatore <sup>1,2,\*</sup>

| Content   |        |
|-----------|--------|
| Table S1  | Pag. 2 |
| Table S2  | Pag. 3 |
| Figure S1 | Pag. 4 |
| Figure S2 | Pag. 5 |
| Figure S3 | Pag. 6 |
| Figure S4 | Pag. 7 |
| Figure S5 | Pag. 8 |

**Table S1.** Percentage of target regions at different values of sequencing coverage.

| N° | Sample ID | 20×     | 30×     | 50×     | 100×    | 500×   | 1000×  |
|----|-----------|---------|---------|---------|---------|--------|--------|
| 1  | 1         | 100.00% | 100.00% | 99.99%  | 99.99%  | 74.67% | 46.47% |
| 2  | 2         | 100.00% | 100.00% | 100.00% | 99.99%  | 95.72% | 67.51% |
| 3  | 3         | 100.00% | 100.00% | 99.99%  | 99.99%  | 89.36% | 57.32% |
| 4  | 4         | 100.00% | 100.00% | 100.00% | 100.00% | 96.74% | 73.86% |
| 5  | 5         | 100.00% | 100.00% | 100.00% | 95.74%  | 73.04% | 67.95% |
| 6  | 8         | 100.00% | 100.00% | 100.00% | 99.99%  | 81.75% | 59.47% |
| 7  | 9         | 100.00% | 100.00% | 100.00% | 99.99%  | 79.09% | 63.52% |
| 8  | 10        | 100.00% | 100.00% | 100.00% | 100.00% | 91.07% | 68.80% |
| 9  | 11        | 99.00%  | 99.00%  | 99.00%  | 98.99%  | 80.49% | 70.53% |
| 10 | 12        | 100.00% | 100.00% | 100.00% | 100.00% | 82.56% | 69.78% |
| 11 | 13        | 100.00% | 100.00% | 99.99%  | 99.99%  | 79.38% | 61.70% |
| 12 | 14        | 100.00% | 100.00% | 100.00% | 99.99%  | 87.23% | 68.17% |
| 13 | 15        | 100.00% | 100.00% | 99.99%  | 99.99%  | 91.58% | 59.69% |
| 14 | 16        | 100.00% | 100.00% | 99.99%  | 99.99%  | 81.72% | 56.27% |
| 15 | 17        | 99.07%  | 99.07%  | 99.07%  | 99.06%  | 89.10% | 61.57% |
| 16 | 18        | 100.00% | 100.00% | 99.99%  | 99.99%  | 83.94% | 62.29% |
| 17 | 19        | 100.00% | 100.00% | 99.99%  | 99.99%  | 90.59% | 57.35% |
| 18 | 20        | 100.00% | 100.00% | 99.99%  | 99.99%  | 80.92% | 63.42% |
| 19 | 22        | 100.00% | 100.00% | 99.99%  | 99.99%  | 89.53% | 66.89% |
| 20 | 23        | 100.00% | 100.00% | 100.00% | 100.00% | 96.76% | 75.00% |
| 21 | 24        | 91.68%  | 91.68%  | 91.68%  | 91.67%  | 86.40% | 65.32% |
| 22 | 25        | 89.08%  | 89.08%  | 89.08%  | 88.17%  | 65.97% | 62.67% |
| 23 | 26        | 92.52%  | 92.52%  | 90.28%  | 77.07%  | 66.95% | 63.02% |
| 24 | 28        | 97.40%  | 97.40%  | 97.39%  | 97.39%  | 95.68% | 85.35% |
| 25 | 29        | 100.00% | 100.00% | 100.00% | 100.00% | 94.28% | 70.12% |
| 26 | 30        | 100.00% | 100.00% | 100.00% | 99.99%  | 78.60% | 64.59% |
| 27 | 31        | 100.00% | 100.00% | 100.00% | 99.99%  | 96.08% | 77.74% |
| 28 | 32        | 100.00% | 100.00% | 100.00% | 100.00% | 96.18% | 79.53% |
| 29 | 34        | 100.00% | 100.00% | 100.00% | 100.00% | 95.38% | 71.33% |
| 30 | 35        | 100.00% | 100.00% | 100.00% | 100.00% | 88.96% | 51.13% |
| 31 | 38        | 99.07%  | 99.07%  | 99.07%  | 99.06%  | 96.39% | 78.13% |
| 32 | 40        | 89.08%  | 89.08%  | 89.08%  | 89.08%  | 89.07% | 79.49% |
| 33 | 41        | 97.40%  | 97.40%  | 97.39%  | 97.39%  | 90.26% | 46.01% |
| 34 | 42        | 95.89%  | 95.89%  | 95.89%  | 95.88%  | 89.64% | 50.97% |
| 35 | 43        | 99.19%  | 99.19%  | 99.18%  | 99.18%  | 93.87% | 61.71% |
| 36 | 44        | 68.85%  | 68.85%  | 68.85%  | 68.83%  | 66.91% | 51.71% |
| 37 | 45        | 94.15%  | 94.15%  | 94.14%  | 94.14%  | 93.12% | 81.99% |
| 38 | 46        | 100.00% | 100.00% | 100.00% | 99.99%  | 98.64% | 92.74% |
| 39 | 47        | 100.00% | 100.00% | 100.00% | 99.99%  | 99.99% | 86.57% |
| 40 | 48        | 100.00% | 100.00% | 99.99%  | 99.99%  | 98.64% | 90.07% |

**Table S2.** General run statistics of the CNV analysis.

| N° | Sample ID | Average Coverage<br>per Region | Min. Average<br>Coverage per Plex | Residual Noise | Noise Status |
|----|-----------|--------------------------------|-----------------------------------|----------------|--------------|
| 1  | 1         | 1150                           | 334                               | 0.081          | low-noise    |
| 2  | 2         | 1850                           | 728                               | 0.08           | medium-noise |
| 3  | 3         | 1306                           | 797                               | 0.065          | low-noise    |
| 4  | 4         | 1708                           | 770                               | 0.062          | low-noise    |
| 5  | 5         | 2042                           | 216                               | 0.079          | medium-noise |
| 6  | 8         | 1844                           | 529                               | 0.078          | medium-noise |
| 7  | 9         | 1890                           | 457                               | 0.064          | low-noise    |
| 8  | 10        | 1891                           | 623                               | 0.067          | low-noise    |
| 9  | 11        | 1894                           | 501                               | 0.08           | medium-noise |
| 10 | 12        | 1666                           | 519                               | 0.07           | low-noise    |
| 11 | 13        | 1440                           | 481                               | 0.062          | low-noise    |
| 12 | 14        | 1771                           | 575                               | 0.063          | low-noise    |
| 13 | 15        | 1370                           | 678                               | 0.061          | low-noise    |
| 14 | 16        | 1669                           | 454                               | 0.062          | low-noise    |
| 15 | 17        | 1655                           | 686                               | 0.068          | low-noise    |
| 16 | 18        | 1577                           | 519                               | 0.053          | low-noise    |
| 17 | 19        | 1532                           | 715                               | 0.064          | low-noise    |
| 18 | 20        | 1544                           | 441                               | 0.069          | low-noise    |
| 19 | 22        | 1549                           | 796                               | 0.075          | low-noise    |
| 20 | 23        | 1782                           | 1016                              | 0.066          | low-noise    |
| 21 | 24        | 1532                           | 754                               | 0.084          | low-noise    |
| 22 | 25        | 1550                           | 270                               | 0.101          | medium-noise |
| 23 | 26        | 1587                           | 101                               | 0.1            | medium-noise |
| 24 | 28        | 2154                           | 1229                              | 0.132          | rejected     |
| 25 | 29        | 1439                           | 1053                              | 0.077          | low-noise    |
| 26 | 30        | 1793                           | 429                               | 0.08           | medium-noise |
| 27 | 31        | 1561                           | 1392                              | 0.069          | low-noise    |
| 28 | 32        | 1514                           | 1366                              | 0.07           | medium-noise |
| 29 | 34        | 1422                           | 1100                              | 0.068          | low-noise    |
| 30 | 35        | 1171                           | 999                               | 0.069          | low-noise    |
| 31 | 38        | 1640                           | 1113                              | 0.078          | low-noise    |
| 32 | 40        | 1869                           | 1729                              | 0.065          | low-noise    |
| 33 | 41        | 1119                           | 875                               | 0.095          | medium-noise |
| 34 | 42        | 1120                           | 941                               | 0.092          | medium-noise |
| 35 | 43        | 1343                           | 1112                              | 0.126          | rejected     |
| 36 | 44        | 1108                           | 1                                 | 0.533          | rejected     |
| 37 | 45        | 1795                           | 1273                              | 0.072          | low-noise    |
| 38 | 46        | 2367                           | 1541                              | 0.103          | medium-noise |
| 39 | 47        | 1874                           | 1396                              | 0.099          | medium-noise |
| 40 | 48        | 1822                           | 1473                              | 0.17           | rejected     |

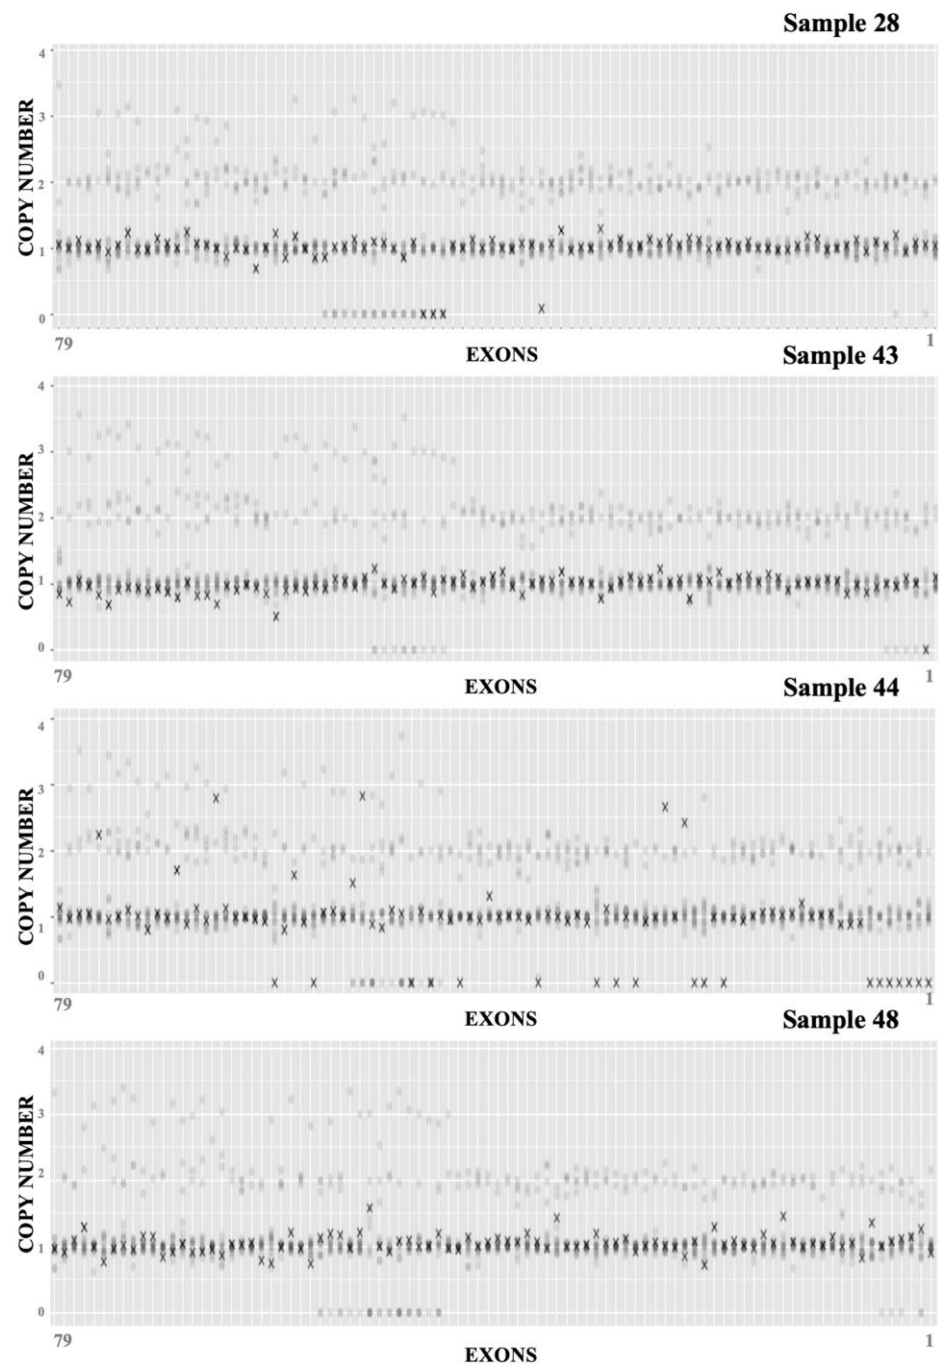

**Figure S1.** Panel of rejected samples for CNV analysis. Four samples were rejected automatically by the software Sophia Genetics for CNV analysis. The horizontal axis shows the exons and the vertical axis the copy number value.

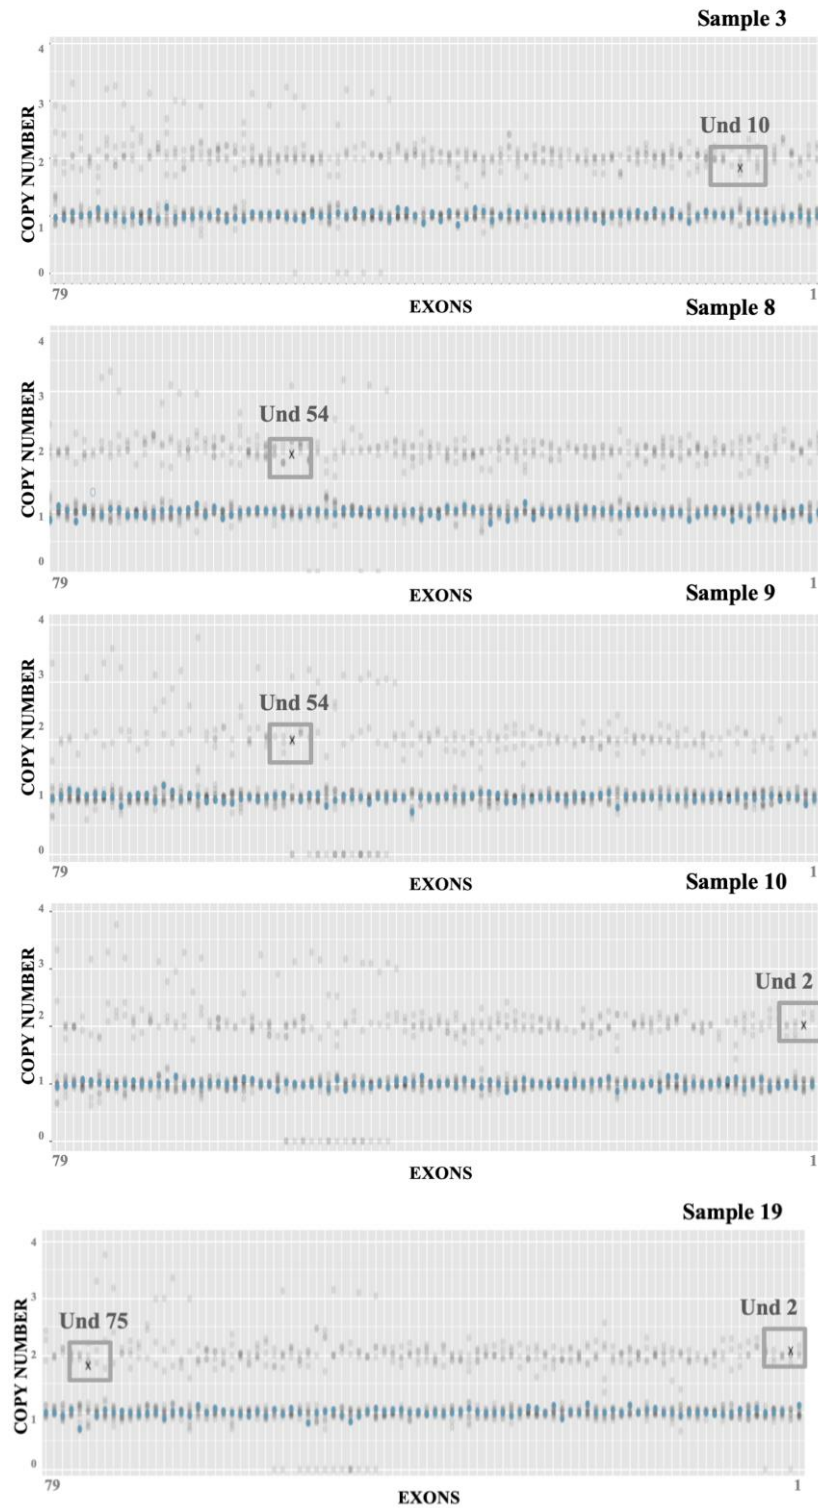

**Figure S2.** Panel of samples with undetermined regions. The CNV analysis performed by Sophia Genetics software shows 5 samples with some undetermined regions identified by a cross and marked in the figure (Und: Undetermined).

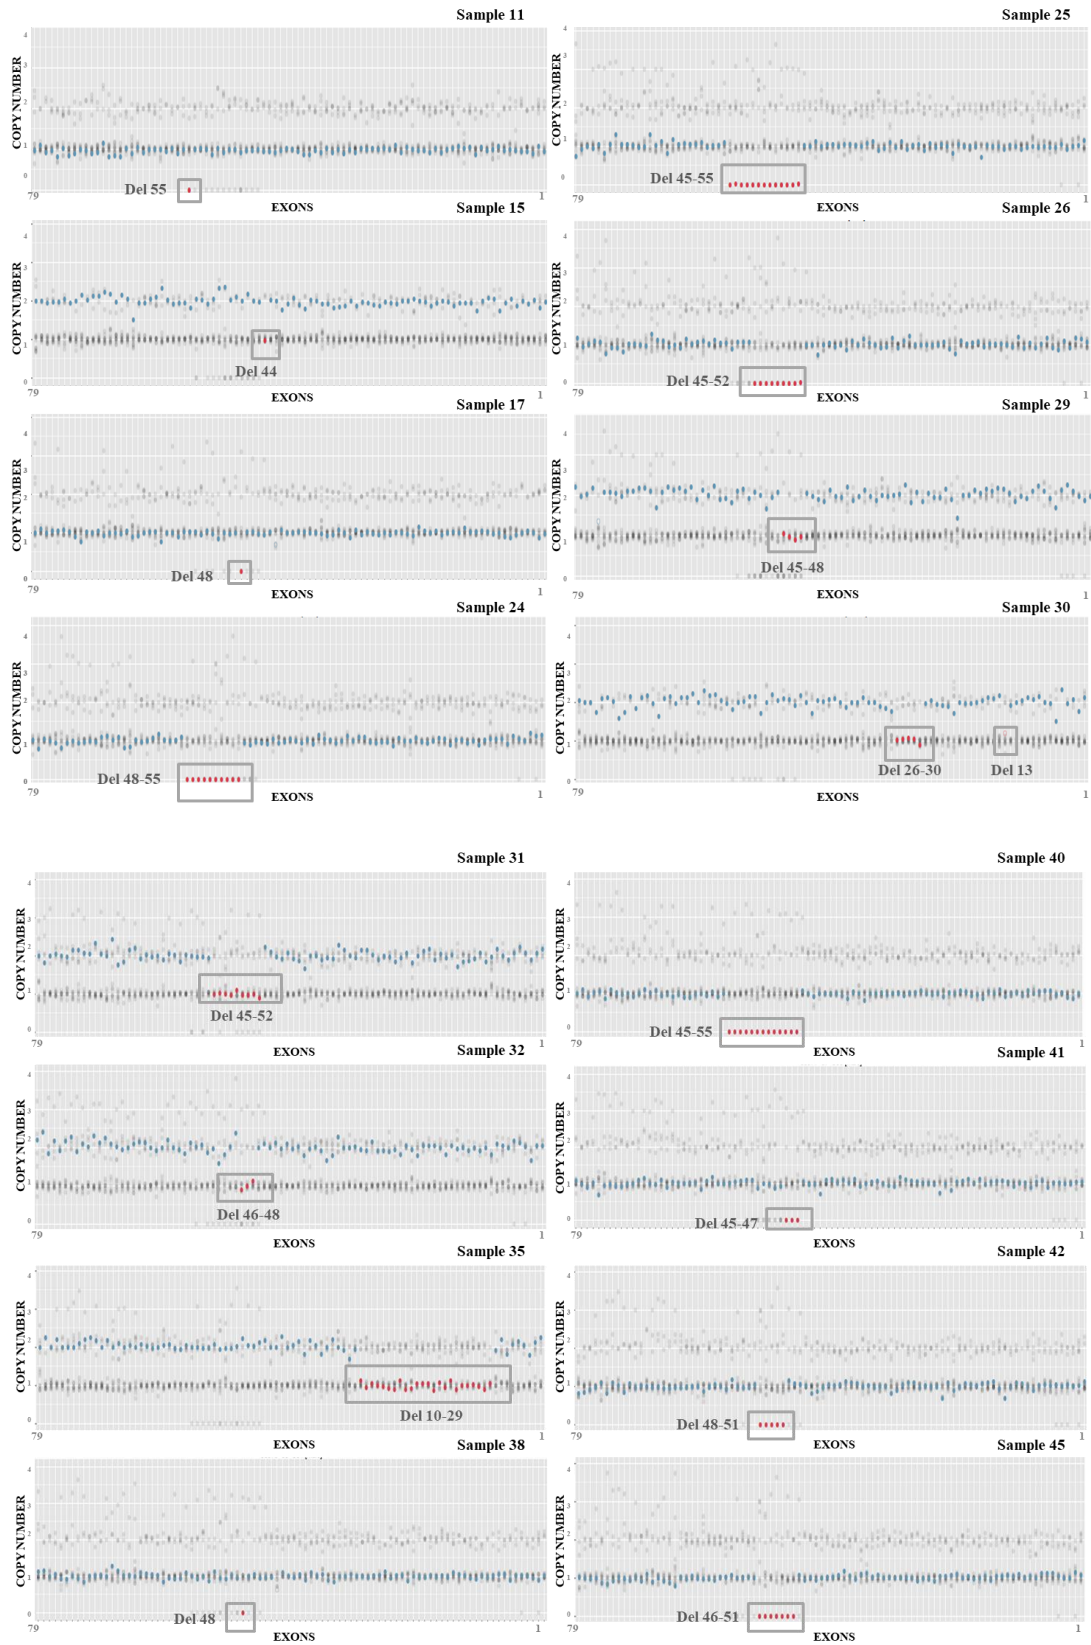

**Figure S3.** NGS-based deletion detection (red color) in DMD by Sophia Genetics Software. Sixteen samples were identified as deleted after the bioinformatic analysis of the NGS data.

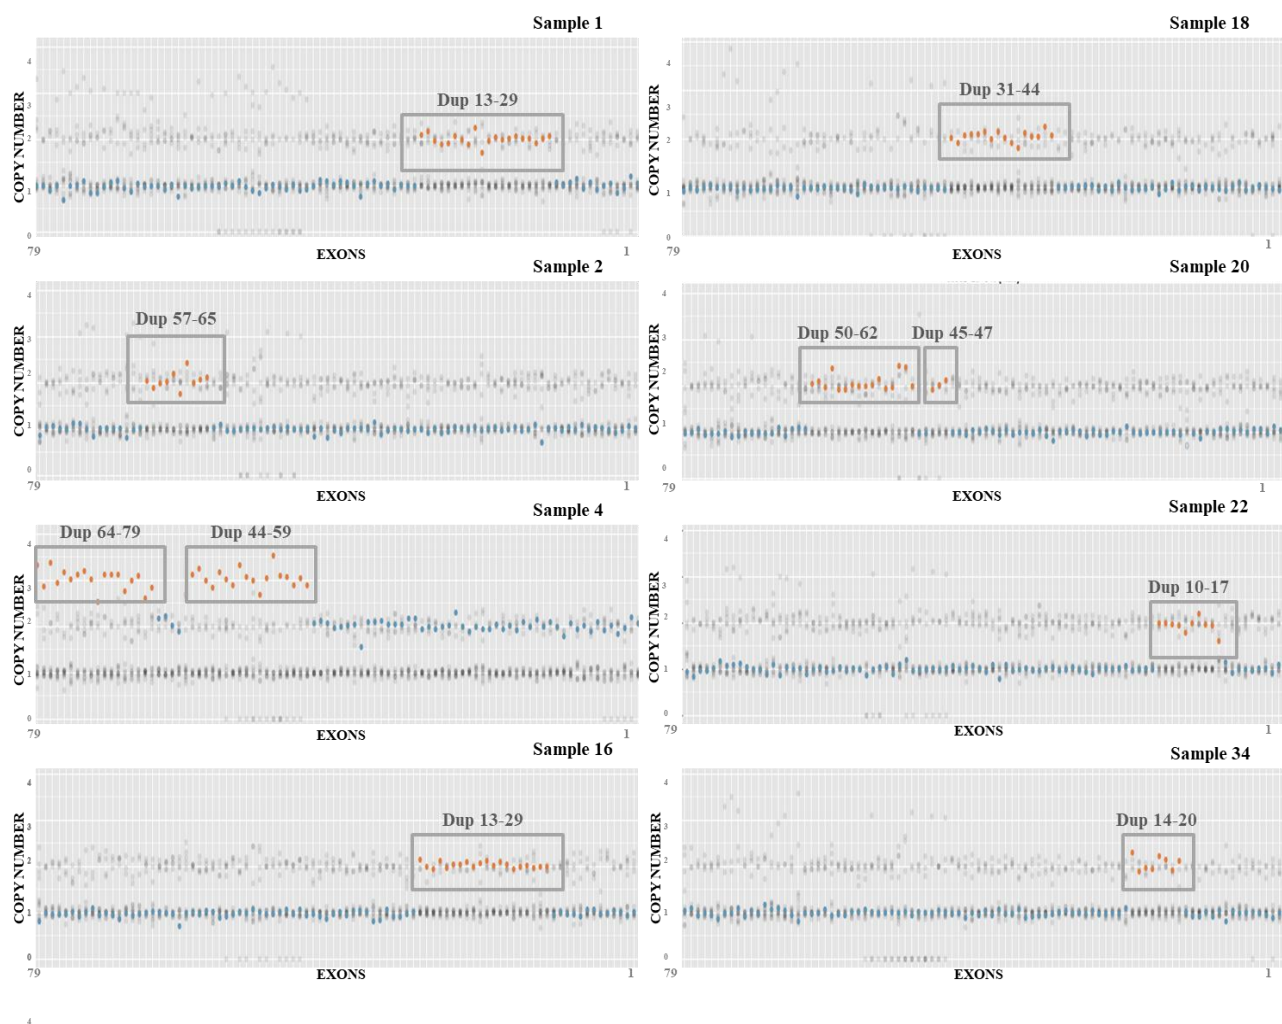

**Figure S4.** NGS-based duplication detection (orange color) in DMD by Sophia Genetics Software. Eight samples were detected as duplicated by the bioinformatic evaluation of the NGS data.

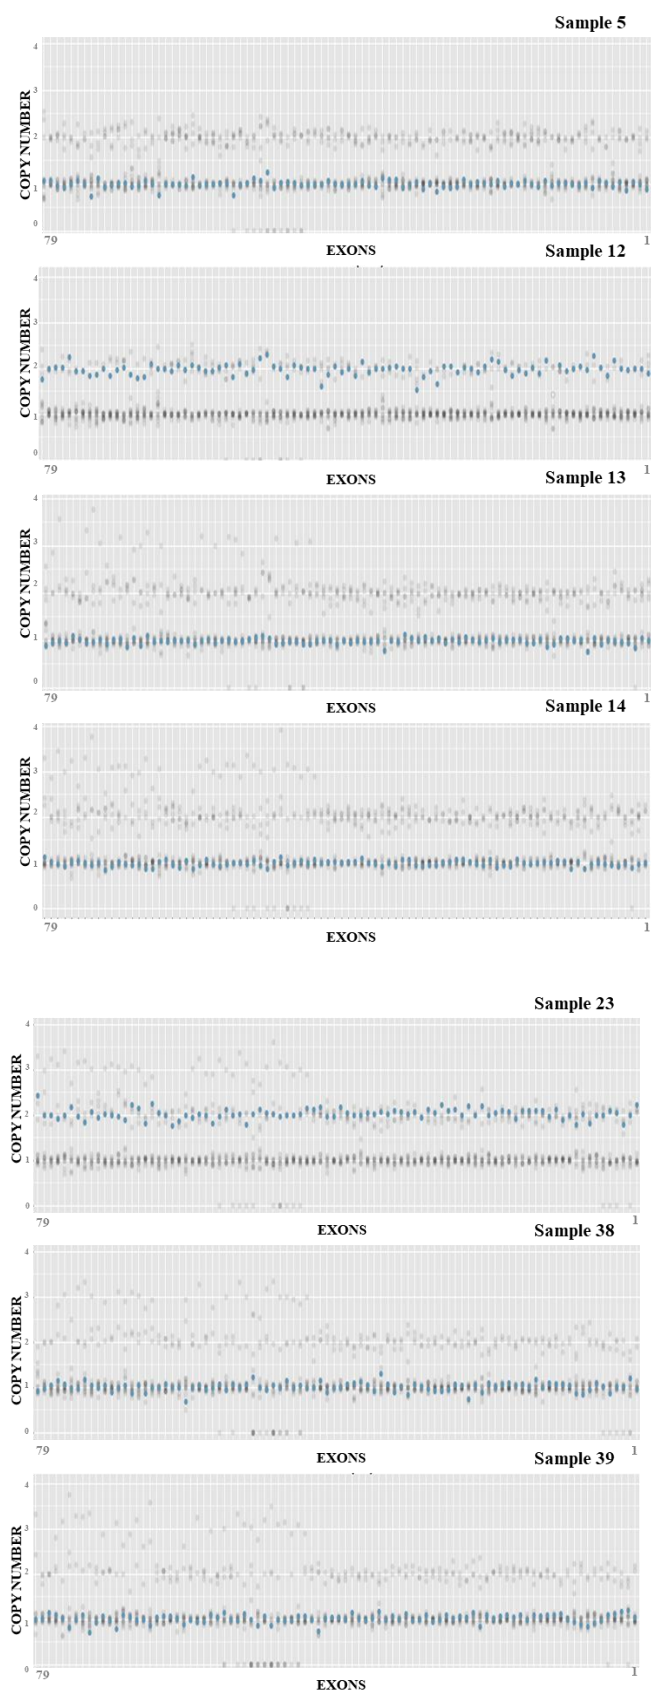

**Figure S5.** Panel of wild-type samples for CNV analysis. Seven samples resulted to carry no *DMD* CNVs, so showing normal profiles (blue dots).
